# Supplementary material
Source: publisher figshare collection journal article supplement (https://tandf.figshare.com/ndownloader/files/24413885)
Supplement: Supplementary file 1 [file 24413885]

**Supplementary material**

**Fig. S1** (A) The location of townships (n = 168) included in the 2014 National Survey of Substance Use and the four major cities (marked by boundaries in red) in Taiwan, and the corresponding factor score distributions (by quartile) of the three residential-level variables: (B) Rural Disadvantage; (C) Affluence; and (D) Family Fragmentation.

**Table S1**. Descriptive statistics of 16 residential-level variables across 358 Taiwanese townships

**Table S2**. Number and percent (weighted, %wt) of participants in each quartile of residential-level factors by substance use pattern (N = 13,392)

**Table S3**. Multilevel analysis including the individual-level variables only, showing their associations with the patterns of areca nut, alcohol, and tobacco use among adult participants (N = 13,392) in the 2014 National Survey of Substance Use in Taiwan.

**Table S4**. Multilevel analysis of the association between individual- and residential-level variables (aboriginal township additionally included) and the use patterns of alcohol, tobacco, and areca nut among adult participants (N = 13,392) in the 2014 National Survey of Substance Use in Taiwan

**
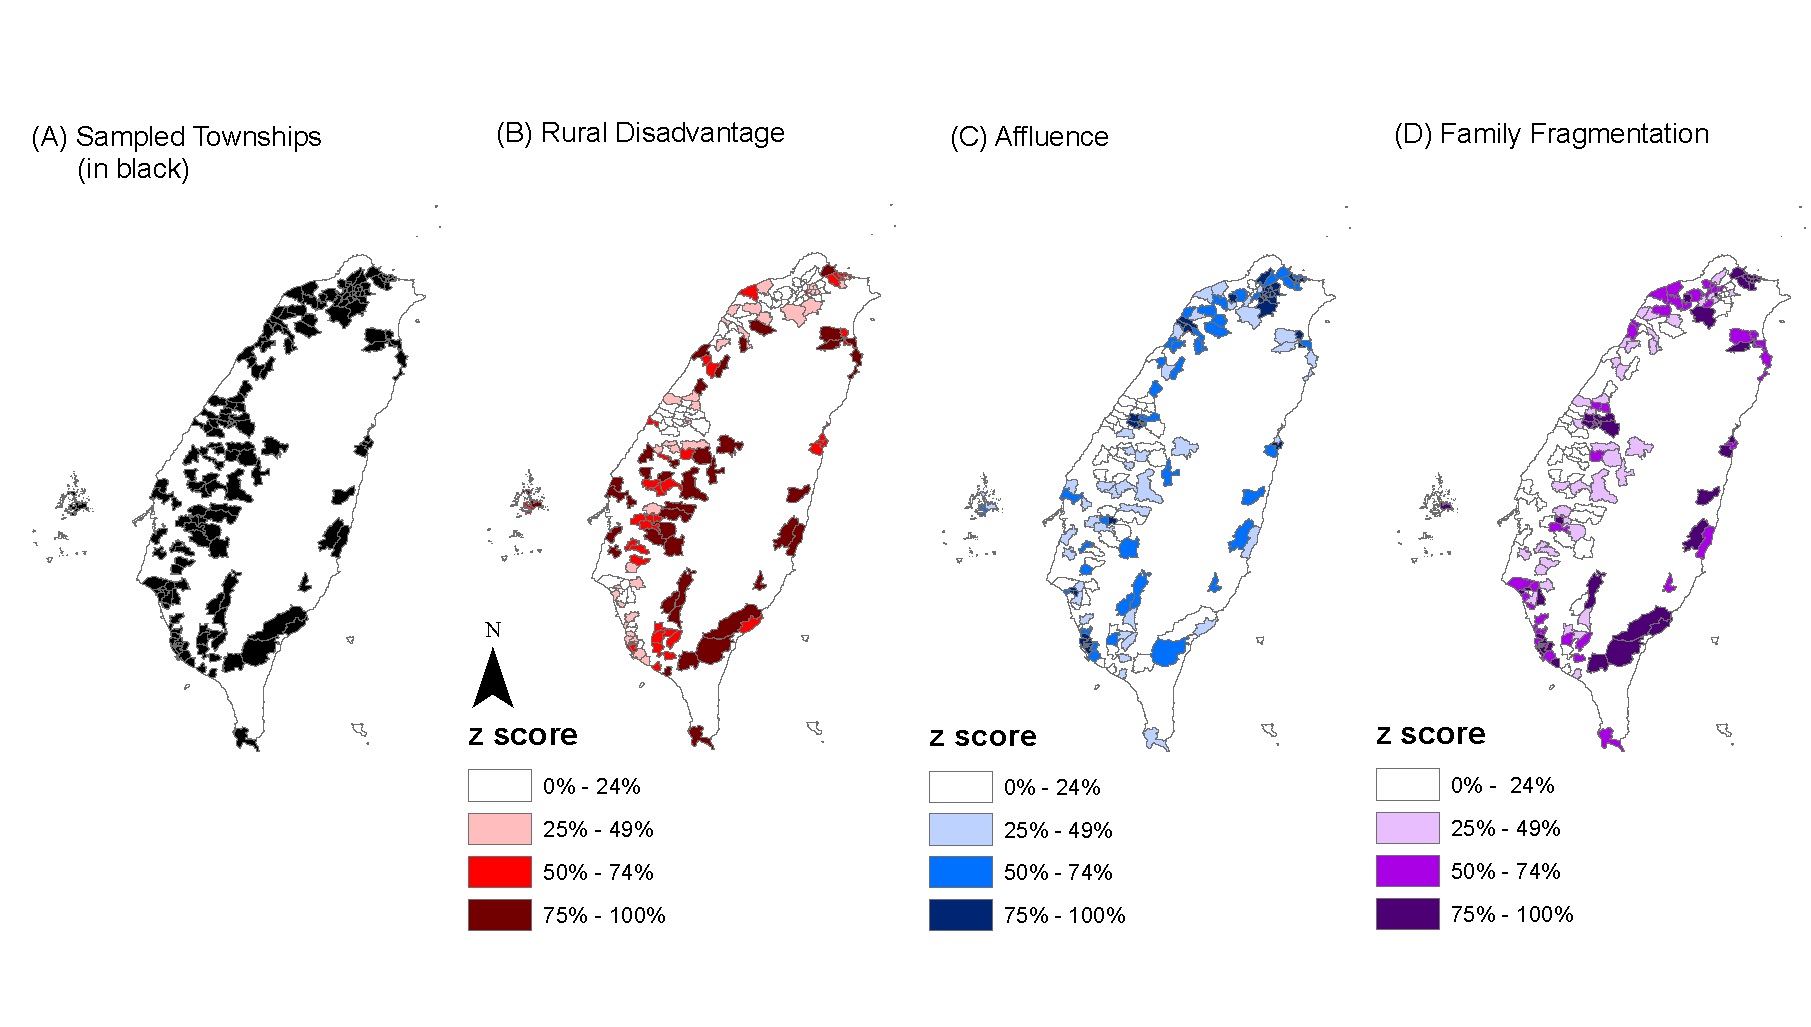
**

**Fig. S1** (A) The location of townships (n = 168) included in the 2014 National Survey of Substance Use and the four major cities (marked by boundaries in red) in Taiwan, and the corresponding factor score distributions (by quartile) of the three residential-level variables: (B) Rural Disadvantage; (C) Affluence; and (D) Family Fragmentation.

**Table S1. Descriptive statistics of 16 residential-level variables across 358 Taiwanese townships.**

| **Variables** | **Mean** | **SD** | **Minimum** | **Median** | **Maximum** |
| --- | --- | --- | --- | --- | --- |
| Coefficient of variation of household income | 140.24 | 158.00 | 65.06 | 97.01 | 1665.95 |
| Agriculture workers in the working population (%)a | 15.83 | 16.55 | 0.03 | 8.80 | 71.00 |
| Low-income households (%)a | 2.44 | 2.22 | 0.08 | 1.70 | 18.35 |
| Overcrowded households (%)a | 22.47 | 5.94 | 4.13 | 22.25 | 43.97 |
| Median household income (1000NT dollars)a | 508.91 | 64.33 | 348.00 | 496.00 | 832.00 |
| Adult with college or higher education (%)a | 24.58 | 12.56 | 6.64 | 22.05 | 69.90 |
| Unemployed adult population (%) | 40.72 | 7.18 | 25.12 | 39.10 | 72.53 |
| Population with disabilities (%)a | 5.93 | 1.80 | 2.66 | 5.75 | 11.16 |
| Households not owner occupied (%) | 18.97 | 6.07 | 1.78 | 18.76 | 37.80 |
| Population with long-term care (%)a | 3.01 | 1.38 | 0.55 | 2.79 | 10.80 |
| Population mobility (%)a | 9.48 | 2.82 | 4.97 | 9.01 | 23.22 |
| Unmarried adult population (%)a | 27.82 | 6.57 | 14.20 | 27.47 | 44.90 |
| Divorced or separated adult population (%)a | 5.52 | 1.65 | 2.42 | 5.25 | 11.34 |
| Lone-parent households (%)a | 6.71 | 1.74 | 2.60 | 6.52 | 12.05 |
| Population aged 65 and above (%)a | 14.67 | 5.80 | 4.44 | 13.28 | 34.44 |
| Population Density (%)a | 2834.37 | 5769.05 | 5.12 | 654.44 | 41047.29 |
| a log-transformed values of these variables were used in the analyses due to right skewed distributions. | | | | | |

**Table S2. Number and percent (weighted, %wt) of participants in each quartile of residential**-level factors by substance use pattern (N = 13,392).

|  |  |  | | **Alcohol** | | | | |  | **Tobacco** | | | | |
| --- | --- | --- | --- | --- | --- | --- | --- | --- | --- | --- | --- | --- | --- | --- |
|  | **Total** | **Areca nut use** | | **Harmful use** | |  | **Low-risk use** | |  | **Nicotine dependence** | |  | **Regular active use** | |
| **Variable** | **N** | **n** | **(%wt)** | **n** | **(%wt)** |  | **n** | **(%wt)** |  | **n** | **(%wt)** |  | **n** | **(%wt)** |
| Residential Rural Disadvantage | |  |  |  |  |  |  |  |  |  |  |  |  |  |
| Q1 (least disadvantaged) | 3393 | 194 | (5.81) | 205 | (6.74) |  | 1507 | (47.58) |  | 341 | (10.48) |  | 344 | (11.11) |
| Q2 | 3302 | 183 | (6.16) | 229 | (6.86) |  | 1291 | (42.84) |  | 349 | (10.62) |  | 280 | (8.65) |
| Q3 | 3304 | 231 | (6.52) | 255 | (8.08) |  | 1340 | (42.03) |  | 408 | (12.05) |  | 258 | (7.72) |
| Q4 (most disadvantaged) | 3393 | 482 | (13.95) | 340 | (10.29) |  | 1284 | (39.68) |  | 565 | (16.99) |  | 309 | (10.04) |
| Residential Affluence |  |  |  |  |  |  |  |  |  |  |  |  |  |  |
| Q1 (most affluent) | 3236 | 138 | (3.79) | 174 | (5.74) |  | 1381 | (48.97) |  | 308 | (8.48) |  | 276 | (8.97) |
| Q2 | 3449 | 288 | (7.99) | 284 | (8.02) |  | 1441 | (45.08) |  | 461 | (12.58) |  | 333 | (11.50) |
| Q3 | 3335 | 375 | (10.22) | 294 | (8.47) |  | 1359 | (44.49) |  | 468 | (15.22) |  | 313 | (10.09) |
| Q4 (least affluent) | 3372 | 289 | (7.95) | 277 | (8.17) |  | 1241 | (38.11) |  | 426 | (11.73) |  | 269 | (8.81) |
| Residential Family Fragmentation | |  |  |  |  |  |  |  |  |  |  |  |  |  |
| Q1 (least fragmented) | 3324 | 253 | (6.42) | 226 | (6.67) |  | 1256 | (42.44) |  | 404 | (10.41) |  | 262 | (8.38) |
| Q2 | 3466 | 280 | (6.55) | 246 | (6.93) |  | 1410 | (43.38) |  | 429 | (11.49) |  | 308 | (10.04) |
| Q3 | 3503 | 268 | (7.97) | 271 | (8.59) |  | 1514 | (47.31) |  | 426 | (12.91) |  | 321 | (9.91) |
| Q4 (most fragmented) | 3099 | 289 | (8.24) | 286 | (7.81) |  | 1242 | (42.80) |  | 404 | (12.03) |  | 300 | (10.48) |

**Table S3. Multilevel analysis including the individual-level variables only, showing their associations with the patterns of areca nut, alcohol, and tobacco use among adult participants (N = 13,392) in the 2014 National Survey of Substance Use in Taiwan.**

| **Variables** | **Areca nut** | | **Alcohol** | | | | **Tobacco** | | | |
| --- | --- | --- | --- | --- | --- | --- | --- | --- | --- | --- |
| **Past-year use** | | **Harmful use** | | **Low-risk use** | | **Nicotine dependence** | | **Regular active use** | |
| **aOR** | **(95% CI)** | **aOR** | **(95% CI)** | **aOR** | **(95% CI)** | **aOR** | **(95% CI)** | **aOR** | **(95% CI)** |
| **Individual-level variables** |  |  |  |  |  |  |  |  |  |  |
| Male (vs. female) | 21.06 | (15.21, 29.14)** | 17.1 | (12.55, 23.26)** | 2.01 | (1.82, 2.23)** | 19.47 | (15.62, 24.28)** | 8.60 | (6.93, 10.68)** |
| Age (vs. 45-64 years) |  |  |  |  |  |  |  |  |  |  |
| 18-34 | 2.54 | (1.81, 3.58)** | 1.66 | (1.22, 2.24)** | 1.52 | (1.30, 1.77)** | 1.93 | (1.41, 2.62)** | 1.73 | (1.23, 2.44)** |
| 35-44 | 3.37 | (2.64, 4.32)** | 1.71 | (1.38, 2.13)** | 1.37 | (1.17, 1.61)** | 2.72 | (2.19, 3.39)** | 2.02 | (1.61, 2.54)** |
| Marital status (vs. married) |  |  |  |  |  |  |  |  |  |  |
| Divorced/widowed/ separated | 1.83 | (1.33, 2.51)** | 2.07 | (1.43, 3.00)** | 1.12 | (0.92, 1.36) | 2.77 | (2.08, 3.70)** | 1.79 | (1.36, 2.35)** |
| Single | 0.58 | (0.46, 0.74)** | 0.83 | (0.62, 1.12) | 1.05 | (0.91, 1.20) | 0.80 | (0.60, 1.07) | 0.78 | (0.59, 1.02) |
| Education level (vs. college or above) |  |  |  |  |  |  |  |  |  |  |
| Junior high school or below | 6.18 | (4.64, 8.23)** | 1.76 | (1.35, 2.29)** | 0.39 | (0.34, 0.45)** | 6.47 | (5.06, 8.27)** | 1.89 | (1.51, 2.36)** |
| Senior high school | 3.51 | (2.95, 4.17)** | 1.46 | (1.19, 1.80)** | 0.55 | (0.50, 0.61)** | 4.53 | (3.77, 5.43)** | 1.93 | (1.59, 2.35)** |
| Occupation (vs. Group 1: other) |  |  |  |  |  |  |  |  |  |  |
| Group 2: service and sales worker | 0.87 | (0.67, 1.14) | 1.69 | (1.29, 2.22)** | 0.97 | (0.84, 1.12) | 1.33 | (1.08, 1.64)** | 1.35 | (1.10, 1.64)** |
| Group 3: laborers | 1.38 | (1.03, 1.86)* | 1.00 | (0.74, 1.36) | 0.89 | (0.72, 1.10) | 1.54 | (1.14, 2.08)** | 1.38 | (1.07, 1.78)* |
| Group 4: unemployed or retired | 0.59 | (0.45, 0.79)** | 0.60 | (0.47, 0.76)** | 0.59 | (0.52, 0.68)** | 0.71 | (0.58, 0.88)** | 0.64 | (0.53, 0.77)** |
| **Random effects** |  |  |  |  |  |  |  |  |  |  |
| Area-level variance (p value) | 0.23 | (<0.001) | 0.29 | (<0.001) | 0.2 | (<0.001) | 0.14 | (<0.001) | 0.15 | (<0.001) |
| Intraclass correlation coefficient | 0.06 |  | 0.08 |  | 0.06 |  | 0.04 |  | 0.04 |  |
| Median odds ratio | 1.58 |  | 1.67 |  | 1.53 |  | 1.42 |  | 1.44 |  |

*p<0.05 **p<0.01; aOR=adjusted odds ratio.

**Table S4. Multilevel analysis of the association between individual- and residential-level variables (aboriginal township additionally included) and the use patterns of alcohol, tobacco, and areca nut among adult participants (N = 13,392) in the 2014 National Survey of Substance Use in Taiwan.**

| **Variables** |  | **Areca nut** | | **Alcohol** | | | | **Tobacco** | | | |
| --- | --- | --- | --- | --- | --- | --- | --- | --- | --- | --- | --- |
|  | **Past-year use** | | **Harmful use** | | **Low risk use** | | **Nicotine dependence** | | **Regular active use** | |
|  | **aOR** | **(95% CI)** | **aOR** | **(95% CI)** | **aOR** | **(95% CI)** | **aOR** | **(95% CI)** | **aOR** | **(95% CI)** |
| **Individual-level variables** |  |  |  |  |  |  |  |  |  |  |  |
| Male (vs. Female) |  | 21.14 | (15.26, 29.28)** | 17.03 | (12.51, 23.18)** | 2.02 | (1.83, 2.23)** | 19.55 | (15.71, 24.33)** | 8.65 | (6.96, 10.77)** |
| Age (vs. 45-64 years) |  |  |  |  |  |  |  |  |  |  |  |
| 18-34 |  | 2.50 | (1.78, 3.50)** | 1.64 | (1.21, 2.21)** | 1.54 | (1.32, 1.80)** | 1.92 | (1.41, 2.62)** | 1.75 | (1.24, 2.47)** |
| 35-44 |  | 3.38 | (2.63, 4.34)** | 1.70 | (1.36, 2.11)** | 1.38 | (1.18, 1.63)** | 2.73 | (2.20, 3.39)** | 2.03 | (1.61, 2.55)** |
| Marital status (vs. Married) |  |  |  |  |  |  |  |  |  |  |  |
| Divorced/ widowed/ separated |  | 1.79 | (1.31, 2.46)** | 2.05 | (1.42, 2.97)** | 1.11 | (0.91, 1.36) | 2.74 | (2.06, 3.65)** | 1.78 | (1.35, 2.34)** |
| Unmarried |  | 0.59 | (0.47, 0.74)** | 0.84 | (0.63, 1.12) | 1.05 | (0.91, 1.20) | 0.80 | (0.60, 1.07) | 0.77 | (0.59, 1.02) |
| Education level (vs. college or above) |  |  |  |  |  |  |  |  |  |  |  |
| Junior high school or below |  | 5.62 | (4.17, 7.58)** | 1.68 | (1.29, 2.20)** | 0.40 | (0.35, 0.47)** | 6.39 | (5.00, 8.17)** | 1.95 | (1.54, 2.46)** |
| Senior high school |  | 3.36 | (2.81, 4.02)** | 1.42 | (1.16, 1.75)** | 0.57 | (0.51, 0.63)** | 4.51 | (3.78, 5.38)** | 1.97 | (1.61, 2.40)** |
| Occupation (vs. group1: other) |  |  |  |  |  |  |  |  |  |  |  |
| Group2: service and sales worker |  | 0.87 | (0.67, 1.14) | 1.71 | (1.31, 2.24)** | 0.96 | (0.83, 1.11) | 1.32 | (1.07, 1.64)* | 1.33 | (1.09, 1.62)** |
| Group3: labors |  | 1.35 | (1.00, 1.82)* | 1.00 | (0.73, 1.36) | 0.89 | (0.73, 1.10) | 1.53 | (1.14, 2.07)** | 1.38 | (1.07, 1.78)* |
| Group4: unemployed or retired |  | 0.59 | (0.44, 0.79)** | 0.60 | (0.47, 0.76)** | 0.59 | (0.51, 0.68)** | 0.71 | (0.58, 0.88)** | 0.63 | (0.53, 0.77)** |
| **Residential-level variables** |  |  |  |  |  |  |  |  |  |  |  |
| Factor 1: Rural Disadvantage |  | 1.31 | (1.12, 1.53)** | 1.00 | (0.85, 1.18) | 0.92 | (0.82, 1.02) | 1.10 | (0.99, 1.24) | 0.94 | (0.80, 1.10) |
| Factor 2: Affluence |  | 0.91 | (0.81, 1.03) | 1.09 | (0.95, 1.26) | 1.20 | (1.09, 1.33)** | 1.04 | (0.91, 1.18) | 1.07 | (0.92, 1.23) |
| Factor 3: Family Fragmentation |  | 1.21 | (1.04, 1.41)* | 1.20 | (1.03, 1.41)* | 1.11 | (0.98, 1.26) | 1.24 | (1.05, 1.47)* | 1.21 | (1.02, 1.43)* |
| Aboriginal township |  | 2.19 | (1.60, 2.99)** | 1.79 | (1.08, 2.96)* | 1.32 | (1.01, 1.74)* | 1.06 | (0.74, 1.51) | 1.24 | (0.81, 1.89) |
| **Random effects** |  |  |  |  |  |  |  |  |  |  |  |
| Residential-level variance (p value) |  | 0.07 (<0.001) | | 0.23 (<0.001) | | 0.15 (<0.001 | | 0.11 (<0.001 | | 0.12 (<0.001) | |
| *p<0.05 **p<0.01; aOR=adjusted odds ratio. | | |  |  |  |  |  |  |  |  |  |
